# Supplementary material for: Effects of preparation method and Sm2O3 promoter on CO methanation by a mesoporous NiO–Sm2O3/Al2O3 catalyst
Source: Royal Society of Chemistry journal article supplement (doi:10.1039/c8nj02282h), 2018-01-01
Supplement: c8nj02282h1.pdf [file c8nj02282h1.pdf]

## Supporting Information

### Effects of preparation method and $\text{Sm}_2\text{O}_3$ promoter on CO methanation of mesoporous $\text{NiO-Sm}_2\text{O}_3/\text{Al}_2\text{O}_3$ catalyst

Qing Liu,<sup>\*a</sup> Hongyuan Yang,<sup>a</sup> Hao Dong,<sup>a</sup> Wei Zhang,<sup>a</sup> Bing Bian,<sup>a,b</sup> Qingkun He,<sup>\*c</sup> Jing Yang,<sup>\*a</sup>

Xiangbao Meng,<sup>d</sup> Zhiwei Tian,<sup>a</sup> and Guoming Zhao<sup>a</sup>

<sup>a</sup>*Key Laboratory of Low Carbon Energy and Chemical Engineering, College of Chemical and Environmental Engineering, Shandong University of Science and Technology, Qingdao 266590, Shandong, China*

<sup>b</sup>*College of Chemical Engineering, Qingdao University of Science and Technology, Qingdao 266042, Shandong, China*

<sup>c</sup>*College of Material Science and Engineering, Shandong University of Science and Technology, Qingdao 266590, Shandong, China*

<sup>d</sup>*College of Mining and safety Engineering, Shandong University of Science and Technology, Qingdao 266590, Shandong, China*

\*Corresponding author. E-mail addresses: qliu@sdust.edu.cn, sdsslq@163.com (Q. Liu); qingkunhe@163.com (Q. He); kdyangjing@163.com (J. Yang)

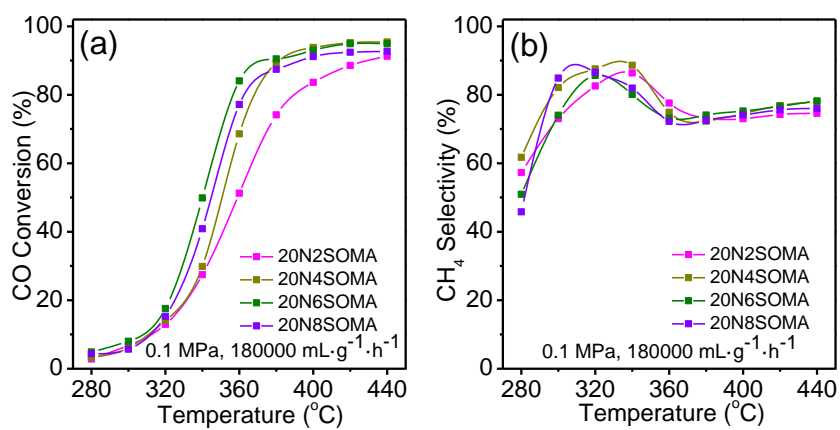

**Fig. S1.** Catalytic properties of the catalysts at 0.1 MPa, 180000 mL g<sup>-1</sup> h<sup>-1</sup>: (a) CO conversion and (b) CH<sub>4</sub> selectivity.
